# Supplementary material
Source: publisher site journal article supplement (https://www.dovepress.com/get_supplementary_file.php?f=208720.docx)
Supplement: Supplementary file 1 [file get_supplementary_file.php]

**Supplemental material**

**Supplemental tables/figures**

**Supplemental Table 1** List of Approving Ethics Committees

| **Name of IEC/IRB** |
| --- |
| Part A |
| Integreview Ethical Review Board  Austin, TX 78704 |
| Committee of Human Research (CHR)  Office of Research  San Francisco, CA 94118 |
| Part B |
| Integreview Ethical Review Board  Austin, TX 78704 |
| Committee of Human Research (CHR)  Office of Research  San Francisco, CA 94118 |
| Liberty IRB, Inc.  Deland, FL 32720 |
| Mary Crowley Medical Research Center Institutional Review Board  Dallas, TX 75251 |
| Cedars-Sinai Medical Center Institutional Review Board  Office of Research Compliance & Quality Improvement  Beverly Hills, CA 90211 |
| Office of Human Research Protection Program (OHRPP)  UCLA Medical Institutional Review Board  Los Angeles, CA 90095 |
| University of Michigan Medical School  Institutional Review Board for Human Subject Research (IRBMED)  Ann Arbor, MI 48109 |
| Institutional Review Board/Privacy Board (IRB/PB)  New York, NY 10065 |
| U.T. MD Anderson Cancer Center  Institutional Review Board  Houston, TX 7703  The University of Texas MD Anderson Cancer Center  Institutional Review Board – Unit 1437  Local IRB# IRB I IRB00000121  Houston, TX 77030 |
| Institutional Review Board  Henry Ford Health System  Detroit, MI 48202 |
| Comite Etic d’Investigacio Clinica  Institut de Recerca  08035 Barcelona (Spain)  Hospital Universitario Virgen del Rocio  Comite Etico de Investigacion Clinica  41013 Sevilla (Spain)  Comite Coordinador de Etico de la Investigacion Biomedica de Andalucia  41020 Sevilla (Spain) |
| Comite Etic d’Investigacio Clinca  Institut de Recerca  09035 Barcelona (Spain) |
| Comite Etico de Investigacion Clinica  Fundacion Hospital de Madrid Hospital  Universitarlo Monteprincipe  Edificio Docente. Facultad de Medicina  Madrid (Spain) |
| Comite Etico de Investigacion Clinica  Regional del Pais Vasco  01010 Vitoria, Alava |
| CPP Ile de France X  Hopital Robert Ballanger  93602 France |
| Ethikkommission der Universitat zu Koln  Geschaftsstelle der Ethikkommission  50937 Cologne (Germany) |

| **Supplemental Table 2** Statistical comparisons of CC-115 plasma pharmacokinetic parameters: bioavailability/food effect substudy (PK population) | | | | | | |
| --- | --- | --- | --- | --- | --- | --- |
| **Treatment Comparison** | **PK Parameter** | **Treatmenta** | **N** | **Geometric Meanb** | **% Ratio of**  **Geometric Meansb** | **95% CI Ratio of**  **Geometric Meansb** |
| 2 versus 1 | AUC∞, ng x h/mL | 2 | 12 | 673.2 | 97.1 | 83.6-112.8 |
| 1 | 12 | 693.2 | – | – |
| Cmax, ng/mL | 2 | 12 | 77.3 | 93.4 | 75.6-115.4 |
| 1 | 12 | 82.8 | – | – |
| 3 versus 2 | AUC∞, ng x h/mL | 3 | 12 | 669.0 | 99.4 | 82.2-120.1 |
| 2 | 12 | 673.2 | – | – |
| Cmax, ng/mL | 3 | 12 | 46.2 | 59.7 | 48.3-73.8 |
| 2 | 12 | 77.3 | – | – |
| **Treatment Comparison** | **PK Parameter** | **Treatmenta** | **N** | **Medianc** | **Median Differencec (95% CI)** | ***P* Valued** |
| 2 versus 1 | Tmax, h | 2 | 12 | 1.50 | –0.38 (–1.00-0.00) | 0.2656 |
| 1 | 12 | 2.00 | – | – |
| 3 versus 2 | Tmax, h | 3 | 12 | 5.00 | 3.50 (1.75-5.75) | 0.0010 |
| 2 | 12 | 1.50 | – | – |
| **Notes:** a Treatment 1: One 10-mg reference CC-115 AIC administered under fasted conditions; Treatment 2: One 10-mg test CC-115 tablet administered under fasted conditions; Treatment 3: One 10-mg test CC-115 tablet administered under fed conditions. b Geometric means, ratio (tablet/AIC or fed/fasted) and 90% CI of the ratio of means from an ANOVA model with treatment, period, and sequence as fixed effects and subject nested within sequence as random effect on the natural log-transformed PK. The ratios and corresponding 90% CIs presented in percentage. cMedian, median difference, (ie, tablet *v* AIC or fed *v* fasted) and corresponding 90% CI from Hodges-Lehmann estimate. d *P* value from Wilcoxon signed-rank test.  **Abbreviations:** AIC, active pharmaceutical ingredient-in-capsule; ANOVA, analysis of variance; AUC∞, area under the concentration-time curve from time 0 extrapolated to infinity; CI, confidence interval; Cmax, maximum concentration; h, hours; PK, pharmacokinetic; Tmax, time to maximum plasma concentration. | | | | | | |

| **Supplemental Table 3** CC-115 plasma and tumor concentrations in patients with GBM at time of resection (approximately 1.5 hours after dosing on Day 15 at 10 mg BID) | | | | | | | | | | | |
| --- | --- | --- | --- | --- | --- | --- | --- | --- | --- | --- | --- |
| **Tissue Type** | **Time, h** | **Patient 1** | **Patient 2** | **Patient 3** | **Patient 4** | **Patient 5** | **Patient 6** | **Patient 7** | **Patient 8** | **Mean** | **SD** |
| GBM, ng/g | 3.0 | 96.50 | 26.00 | 30.58 | 11.79 | 57.58 | 17.76 | 74.61 | 4.01 | 39.85 | 32.88 |
| Plasma, ng/mL | 1.5 | 101.3 | 86.61 | 91.59 | 32.53 | 44.40 | NS | 43.76 | 109.0 | 72.74 | 31.46 |
| GBM/plasma ratio | NA | 0.953 | 0.300 | 0.334 | 0.362 | 1.30 | NA | 1.71 | 0.037 | 0.71 | 0.62 |
| **Abbreviations:** BID, twice daily; GBM, glioblastoma multiforme; h, hours; NA, not available; NS, no sample; SD, standard deviation. | | | | | | | | | | | |

| **Supplemental Table 4** Summary of best overall tumor response in dose-finding (Part A) and cohort expansion (Part B) efficacy population | | | | | | | | |
| --- | --- | --- | --- | --- | --- | --- | --- | --- |
| **Parameters** | **Dose Finding** | **Cohort Expansiona** | | | | | | |
| **Overall**  **(n = 39)** | **HNSCC**  **(n = 17)** | **ES**  **(n = 9)** | **BA/FE**  **(n = 11)** | **GBM**  **(n = 14)** | **CRPC**  **(n = 11)** | **CLL/SLL (IWCLL)**  **(n = 8)** | **CLL/SLL (non-IWCLL)**  **(n = 8)** |
| **ORRb, % (95% CI)** | 5.1 (0.6-17.3) | 0.0 (0.0-19.5) | 0.0 (0.0-33.6) | 18.2 (2.3-51.8) | – | 0.0 (0.0-28.5) | 25.0 (3.2-65.1) | 37.5 (8.5-75.5) |
| **CRb, n (%)** | 1 (2.6) | 0 | 0 | 0 | 0 | 0 | 0 | 0 |
| **PRb, n (%)** | 1 (2.6) | 0 | 0 | 2 (18.2) | 0 | 0 | 2 (25.0) | 3 (37.5) |
| **SDb, n (%)** | 18 (46.2) | 9 (52.9) | 2 (22.2) | 4 (36.4) | 3 (21.4) | 7 (63.6) | 2 (25.0) | 2 (25.0) |
| **PDb, n (%)** | 16 (41.0) | 6 (35.3) | 5 (55.6) | 4 (36.4) | 9 (64.3) | 2 (18.2) | 0 | 1 (12.5) |
| **NE or ND, n (%)** | 3 (7.7) | 2 (11.8) | 2 (22.2) | 1 (9.1) | 2 (14.3) | 2 (18.2) | 1 (12.5) | 0 |
| **Missing, n (%)** | 0 | 0 | 0 | 0 | 0 | 0 | 3 (37.5) | 2 (25.0) |
| **DCR, % (95% CI)** | 51.3 (34.8-67.6) | 52.9 (27.8-77.0) | 22.2 (2.8-60.0) | 54.5 (23.4-83.3) | – | 63.3 (30.8-89.1) | 50.0 (15.7-84.3) | – |
| **Median SD, days (95% CI)** | – | 223 (111-252) | 109 (106-111) | 225 (125-NE) | NA | 345 (112-345) | – | – |
| **Median PFS (95% CI)** | – | 74.0 (50.0-223.0) | 56.0 (43.0-106.0) | 125.0 (62.0-274.0) | 56.5 (53.0-58.0) | 345 (56.0-345.0) | NA (57.0-NA) | |
| **Min, Max** | – | 32, 252 | 43, 111 | 44, 383 | 50, 58 | 56, 345 | 57, 393 | |
| **3-month PFS, % (SE)** | – | 45.5 (14.8) | 28.6 (17.1) | 54.5 (15.0) | 22.2 (12.8) | 87.5 (11.7) | 85.7 (13.2) | |
| **6-month PFS, % (SE)** | – | 34.1 (14.8) | 0.0 (NE) | 43.6 (15.5) | NE | 58.3 (25.1) | 85.7 (13.2) | |
| **Notes:** a HNSCC, ES, BA/FE, GBM, and CRPC cohorts from April 2015 data cut; CLL/SLL cohort from June 2017 data cut. b Unconfirmed best overall response.  **Abbreviations:** BA/FE, bioavailability/food effect (substudy); CI, confidence interval; CLL/SLL, chronic lymphocytic leukemia/small lymphocytic lymphoma; CR, complete response; CRPC, castration-resistant prostate cancer; DCR, disease control rate; ES, Ewing sarcoma; GBM, glioblastoma multiforme; HNSCC, head and neck squamous cell carcinoma; IWCLL, International Workshop on Chronic Lymphocytic Leukemia; NA, not available; ND, not determined; NE, not evaluable; ORR, overall response rate; PD, progressive disease; PFS, progression-free survival; PR, partial response; SD, stable disease; SE, standard error. | | | | | | | | |

**Supplemental Figure 1** Best target lesion response to CC-115 in dose-finding phase (unconfirmed)

**Abbreviations:** BID, twice-daily; CR, complete response; PD, progressive disease; PR, partial response; QD, once-daily; SD, stable disease.
